## Research Article

# A new discovery of STAT4 single nucleotide polymorphisms associated with hepatocellular carcinoma risk in Chinese Han population: a case–control study

Xu Chao<sup>1,2</sup>, Jieqiong Wu<sup>1</sup>, Wei Zhang<sup>1</sup>, Xuesong Feng<sup>1</sup>, Luyan Zhao<sup>1</sup>, Feng Huang<sup>3</sup> and  Chao Jiang<sup>4</sup>

<sup>1</sup>The Second Affiliated Hospital, Shaanxi University of Chinese Medicine, Xianyang 712000, Shaanxi Province, China; <sup>2</sup>The College of Basic Medicine, Shaanxi University of Chinese Medicine, Xianyang 712000, Shaanxi Province, China; <sup>3</sup>Pharmaceutical Factory, Shaanxi University of Chinese Medicine, Xianyang 712000, Shaanxi Province, China; <sup>4</sup>The Third Department of Neurology, The Second Affiliated Hospital of Xi'an Medical University, Xi'an710038, Shaanxi Province, China

**Correspondence:** Chao Jiang (280165056@qq.com)

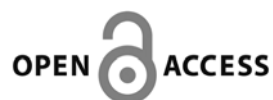

**Background:** Hepatocellular carcinoma (HCC) is a common fatal malignant tumor world-wide. Signal transducer and activator of transcription 4 (STAT4) is HCC susceptibility gene identified by genome-wide association study. The purpose of the present study was to determine the association between four candidate single nucleotide polymorphisms (SNPs) in STAT4 genes and HCC risk in Chinese Han population.

**Methods:** A case–control study was conducted to assess the association between STAT4 SNPs and HCC risk in 1011 Chinese Han population. Agena MassARRAY was used to genotype SNPs. The association between SNPs and HCC susceptibility under different genetic models was evaluated by logistic regression analysis. Multifactorial dimension reduction (MDR) analyzed the interaction of ‘SNP–SNP’ in HCC risk. The difference of clinical characteristics between different genotypes was completed by ANOVA.

**Results:** The results showed that STAT4 rs11889341 was significantly associated with HCC risk under multiple genetic models (homozygote: odds ratio (OR) = 0.60,  $P=0.033$ ; recessive: OR = 0.63,  $P=0.028$ ; log-additive: OR = 0.83,  $P=0.032$ ). The results of subgroup analysis showed that STAT4 rs11889341 is significantly associated with HCC risk with participants who were >55 years, male or smoking. Both STAT4 rs7574865 and rs10174238 were significantly associated with HCC risk among participants who were >55 years, smoking or drinking. STAT4 haplotype ( $T_{rs11889341}T_{rs7574865}$ ) could reduce the risk of HCC. In addition, rs11889341 and rs7574865 were significantly associated with the level of serum ferritin (SF).

**Conclusion:** STAT4 rs11889341, rs7574865 or rs10174238 is potentially associated with HCC risk in Chinese Han population. In particular, rs11889341 showed outstanding association with HCC risk.

## Introduction

Primary hepatocellular carcinoma (abbreviated as ‘HCC’) is a common fatal malignant tumor worldwide, and more than half of the patients have been diagnosed in the middle and advanced stages [1]. HBV infection is the main cause of HCC. Past studies have shown that more than 80% of HCC patients have persistent HBV infection [2–4]. The occurrence and development of cancer is a complex process with multiple factors, multiple genes and multiple stages. It is the result of the combined effect of genetic factors and environmental factors. In recent years, with the development and progress of molecular biology and molecular epidemiology, a number of studies have successively identified genetic variants associated

Received: 20 January 2021  
Revised: 24 May 2021  
Accepted: 25 May 2021

Accepted Manuscript online:  
08 June 2021  
Version of Record published:  
26 July 2021

with the occurrence and development of HCC through genome-wide association studies. These genetic variants can not only assess the HCC susceptibility, but also affect the development of HCC [5–7].

Signal transducer and activator of transcription 4 (STAT4) encoding protein is a key transcription factor of JAK/STAT signaling pathway [8]. STAT4 can be activated by IL-12, regulating the release of inflammatory mediators by T cells and NK cells. STAT4 plays an important biological function in the process of cell differentiation, proliferation, invasion and metastasis induced by cytokines, which participates in the occurrence and development of various diseases such as inflammation and tumors [9]. Studies have shown that abnormal expression of STAT4 may affect the occurrence of lung cancer, gastric adenocarcinoma, liver cancer and other tumors [10,11]. STAT4 was identified as a genetic susceptibility gene for HCC by genome-wide association analysis [6]. Therefore, the research on the association between STAT4 genetic polymorphism and the susceptibility of HCC has attracted more and more attention. Many studies have reported that STAT4 gene polymorphisms have a certain association with the susceptibility of HCC, especially the association between STAT4 rs7574865 and the susceptibility of HCC has been reported many times [12–15]. However, the results of their research are not exactly the same, so the molecular mechanism of HCC susceptibility has not yet been clarified. Therefore, it is necessary to expand the scope of research and conduct studies on the association between STAT4 gene polymorphism and HCC susceptibility among different populations. This will help to lay a good foundation for the studies on the molecular mechanism of STAT4 in HCC susceptibility.

Therefore, the present study took the Chinese Han population as the study subject, and four candidate STAT4 single nucleotide polymorphisms (SNPs; rs3821236 A/G, rs11889341 T/C, rs7574865 T/G, rs10174238 G/A) were selected. The association between the candidate SNPs and the HCC susceptibility in the Chinese Han population will be evaluated. Our study will provide data supplements for the study of the association between STAT4 gene polymorphism and HCC susceptibility in the Chinese Han population. It will also provide new evidence for predicting the targeted therapy and exact molecular mechanism of STAT4 in HCC.

## Materials and methods

### Study subjects

The present study recruited 505 HBV-HCC patients as the case group (HCC group) from the outpatient or inpatient department of the Second Affiliated Hospital of Shaanxi University of Chinese Medicine. The patients were diagnosed with HBV-HCC through histopathological confirmation, liver puncture, clinical manifestations, imaging and other examinations. During the same period, we recruited 506 healthy individuals from the health examination center of the same hospital as the control group. The inclusion criteria of healthy individuals are as follows: no history of other complicated diseases; basic information about age, gender and ethnicity was not significantly different from the case group (excluding the differences in the distribution of exposure factors between case and control group caused by confounding factors). The present study adopted a ‘case–control’ experimental design as a whole. A study on the association between 4 STAT4 candidate SNPs and the HCC risk in the Chinese Han population was conducted among 1011 participants. We conducted a questionnaire survey of all participants through professional doctors. The survey content included demographic and epidemiological information (age, gender, smoking/drinking status etc.). Finally, after obtaining the informed consent of all participants, we collected their peripheral blood samples for DNA extraction. Our research was approved by ethics committee of the Second Affiliated Hospital of Shaanxi University of Chinese Medicine.

### Selection of SNPs

After consulting the relevant literature and the STAT4 gene polymorphism data in the SNP database, the SNPs with the minor allele frequency  $\geq 5\%$  in the research population were selected. Finally, four STAT4 gene polymorphisms (rs3821236 A/G, rs11889341 T/C, rs7574865 T/G, rs10174238 G/A) were selected as candidate SNPs for the present study.

### DNA extraction and genotyping

We performed DNA extraction and purification from peripheral blood samples according to the instructions of the kit (GoldMag Co. Ltd. Xi’an, China). The purified DNA was stored in the refrigerator. All primers in the present study were designed by MassARRAY Assay Design software. We used the MassARRAY system (Agena, San Diego, CA, U.S.A.) to genotype SNPs.

**Table 1 Characteristics of patients with hepatic carcinoma and healthy individuals**

| Characteristics | Cases<br><i>n</i> =505 | Control<br><i>n</i> =506 | <i>P</i> |
|-----------------|------------------------|--------------------------|----------|
| Age (years)     |                        |                          |          |
| Mean ± SD       | 55.00 ± 11.56          | 54.99 ± 10.93            | 0.996    |
| >55             | 239 (47%)              | 234 (46%)                |          |
| ≤55             | 266 (53%)              | 272 (54%)                |          |
| Gender          |                        |                          |          |
| Male            | 393 (78%)              | 394 (78%)                | 0.769    |
| Female          | 112 (22%)              | 112 (22%)                |          |
| Smoking         |                        |                          |          |
| Yes             | 183 (36%)              | 231 (46%)                |          |
| No              | 168 (33%)              | 170 (34%)                |          |
| Drinking        |                        |                          |          |
| Yes             | 185 (37%)              | 132 (26%)                |          |
| No              | 157 (31%)              | 143 (28%)                |          |

*P*<0.05 indicates statistical significance.

## Quality control

We randomly selected 5% of DNA samples for repeatability testing, and the repeatability of experimental results was >99%.

## Statistical analysis

The differences in demographic characteristics (age, gender etc.) in the present study were tested with SPSS version 21.0 software (SPSS, Chicago, IL, U.S.A.). SPSS software was used to detect whether the four candidate STAT4 SNPs meet Hardy–Weinberg equilibrium. The logistic regression model was used to analyze and calculate odds ratio (OR) and 95% confidence interval (CI), which helped us to predict the association between STAT4 genetic polymorphisms and HCC risk (OR value represents the relative risk; OR = 1: this factor has no effect on HCC risk; OR < 1: this factor can reduce the HCC risk; OR > 1: this factor can increase the HCC risk). Using wildtype alleles as a reference, multiple genetic models are estimated (plink 1.07 online tool software). In the present study, haplotype analysis was conducted by plink1.07 and Haploview software and linkage disequilibrium (LD) was calculated. Finally, we used multifactorial dimensional reduction (MDR) to evaluate the impact of the interaction between candidate SNPs on the HCC risk. All statistical results were adjusted by age and gender and all tests were two-sided tests, and the results of *P*<0.05 were considered statistically significant.

## Results

### Sample characteristics

There is no genetic relationship between all participants in the present study. The average age of the case group (HCC patients) was 55.00 ± 11.56 years, 393 male (78%), 112 female (22%); the average age of the control group was 54.99 ± 10.93 years, and 394 male (78%), 112 female (22%). Table 1 summarized the information for all participants. The statistical results showed that there was no statistical difference between the case and the control group in age (*P*=0.996) and gender (*P*=0.769).

### Genotyping and information of candidate SNPs

We successfully genotyped four candidate genetic loci of STAT4 (rs3821236 A/G, rs11889341 T/C, rs7574865 T/G, rs10174238 G/A). The results showed (Table 2) that all candidate SNPs were consistent with HWE (*P*>5%). The results of HaploReg indicate that the candidate SNPs in the *present study* were regulated by many factors, such as Promoter histone marks; Enhancer histone marks; Motifs changed; NHGRI/EBI GWAS hits; GRASP QTL hits; Selected eQTL hits. The detailed information was shown in Table 2.

**Table 2** The basic information and HWE about the selected SNPs of *STAT4*

| Gene  | SNP ID     | Function | Chr: Position | Alleles (A/B) | MAF   |          | HWE (P-value) | Haploreg 4.1                                                                                                            |
|-------|------------|----------|---------------|---------------|-------|----------|---------------|-------------------------------------------------------------------------------------------------------------------------|
|       |            |          |               |               | Cases | Controls |               |                                                                                                                         |
| STAT4 | rs3821236  | intronic | 2:191038032   | A/G           | 0.400 | 0.419    | 0.170         | Promoter histone marks; Enhancer histone marks; Motifs changed; NHGRI/EBI GWAS hits; GRASP QTL hits; Selected eQTL hits |
| STAT4 | rs11889341 | intronic | 2:191079016   | T/C           | 0.280 | 0.319    | 0.919         | Promoter histone marks; Enhancer histone marks; Motifs changed; NHGRI/EBI GWAS hits                                     |
| STAT4 | rs7574865  | intronic | 2:191099907   | T/G           | 0.288 | 0.327    | 0.685         | Enhancer histone marks; Motifs changed; NHGRI/EBI GWAS hits; GRASP QTL hits                                             |
| STAT4 | rs10174238 | intronic | 2:191108308   | G/A           | 0.260 | 0.297    | 0.135         | Motifs changed                                                                                                          |

Abbreviations: HWE, Hardy–Weinberg equilibrium; MAF, minor allele frequency.  $P > 0.05$  indicates that the genotypes were in Hardy–Weinberg equilibrium.

## Association between *STAT4* candidate SNPs and HCC risk

### Overall analysis

The results of the association evaluation showed (Table 3) that only *STAT4* rs11889341 was associated with HCC susceptibility in the participants and had statistical significance. Specifically, rs11889341 had a significant association with HCC susceptibility reduction among participants under the homozygous (TT vs. CC: OR = 0.6, CI = 0.38–0.96,  $P = 0.033$ ), recessive (TT vs. TC-CC: OR = 0.63, CI = 0.40–1.00,  $P = 0.028$ ) and log-additive models (OR = 0.83, CI = 0.68–1.00,  $P = 0.032$ ). We found no evidence that the remaining three candidate SNPs were associated with HCC risk among participants.

### Age and gender

The results of the age subgroup analysis (Table 4) showed that the candidate SNPs significantly associated with the HCC risk among participants older than 55 years were *STAT4* rs11889341, rs7574865 and rs10174238. Similar to the overall analysis result, rs11889341 can significantly reduce the risk of HCC among participants older than 55 years under multiple genetic models (allele: OR = 0.72, CI = 0.54–0.95,  $P = 0.020$ ; homozygote: OR = 0.45, CI = 0.22–0.90,  $P = 0.024$ ; recessive: OR = 0.50, CI = 0.25–0.99,  $P = 0.045$ ; log-additive: OR = 0.71, CI = 0.54–0.95,  $P = 0.020$ ). In addition, we also found that rs7574865 can significantly reduce the risk of HCC among participants older than 55 years under allele (OR = 0.70, CI = 0.53–0.93,  $P = 0.013$ ), homozygote (OR = 0.40, CI = 0.19–0.83,  $P = 0.014$ ), dominant (OR = 0.68, CI = 0.48–1.00,  $P = 0.045$ ), recessive (OR = 0.45, CI = 0.22–0.92,  $P = 0.028$ ), log-additive genetic models (OR = 0.69, CI = 0.52–0.92,  $P = 0.013$ ). rs10174238 also can significantly reduce the risk of HCC among participants older than 55 years under the homozygote (OR = 0.37, CI = 0.15–0.87,  $P = 0.023$ ), recessive (OR = 0.39, CI = 0.17–0.91,  $P = 0.030$ ), log-additive genetic models (OR = 0.74, CI = 0.54–1.00,  $P = 0.045$ ).

The results of gender subgroup analysis showed (Table 4) that only *STAT4* rs11889341 had a significant association with the reduction in HCC risk among male participants (allele: OR = 0.81, CI = 0.66–1.01,  $P = 0.033$ ; homozygote: OR = 0.59, CI = 0.35–1.01,  $P = 0.013$ ; recessive: OR = 0.63, CI = 0.38–1.06,  $P = 0.042$ ; log-additive: OR = 0.81, CI = 0.65–1.01,  $P = 0.041$ ).

### Smoking and drinking

Participants were also divided according to smoking status. The results showed (Table 5) that *STAT4* rs11889341 was only significantly associated with reduction in HCC risk among non-smoking participants under the log-additive model (OR = 0.59, CI = 0.37–0.94,  $P = 0.026$ ). However, rs7574865 (allele: OR = 0.51, CI = 0.31–0.82,  $P = 0.005$ ; homozygote: OR = 0.26, CI = 0.07–0.92,  $P = 0.037$ ; dominant: OR = 0.48, CI = 0.27–0.86,  $P = 0.014$ ; log-additive: OR = 0.53, CI = 0.33–0.85,  $P = 0.008$ ) and rs10174238 (allele: OR = 0.55, CI = 0.33–0.90,  $P = 0.017$ ; heterozygote: OR = 0.50, CI = 0.27–0.95,  $P = 0.034$ ; dominant: OR = 0.49, CI = 0.27–0.90,  $P = 0.021$ ; log-additive: OR = 0.56, CI = 0.34–0.94,  $P = 0.027$ ) were both significantly associated with reducing the HCC risk among non-smoking participants under multiple genetic models.

Participants were divided according to their drinking status. And the results of subgroup showed (Table 5) that *STAT4* rs7574865 and rs10174238 had a significant association with the HCC risk among non-drinking participants. Specifically, rs7574865 significantly reduced the HCC risk under the allele (OR = 0.58, CI = 0.38–0.90,  $P = 0.013$ ), heterozygote (OR = 0.49, CI = 0.27–0.89,  $P = 0.018$ ), dominant (OR = 0.47, CI = 0.27–0.82,  $P = 0.008$ ) and log-additive

**Table 3 Analysis of the association between susceptibility of hepatic carcinoma and SNP of STAT4**

| SNP ID     | Model        | Genotype | Case | Control | Adjusted by age and gender |               |
|------------|--------------|----------|------|---------|----------------------------|---------------|
|            |              |          |      |         | OR (95% CI)                | P             |
| rs3821236  | Allele       | A        | 404  | 422     | 0.93 (0.78–1.11)           | 0.394         |
|            |              | G        | 606  | 586     | 1.00                       |               |
|            | Genotype     | AA       | 73   | 96      | 0.78 (0.54–1.13)           | 0.183         |
|            |              | AG       | 258  | 230     | 1.15 (0.87–1.51)           | 0.323         |
|            |              | GG       | 174  | 178     | 1.00                       |               |
|            | Dominant     | AA-AG    | 331  | 326     | 1.04 (0.8–1.35)            | 0.772         |
|            |              | GG       | 174  | 178     | 1.00                       |               |
|            | Recessive    | AA       | 73   | 96      | 0.72 (0.51–1.00)           | 0.051         |
|            |              | AG-GG    | 432  | 408     | 1.00                       |               |
|            | Log-additive | -        | -    | -       | 0.93 (0.78–1.11)           | 0.395         |
| rs11889341 | Allele       | T        | 281  | 323     | 0.83 (0.69–1.00)           | 0.054         |
|            |              | C        | 723  | 689     | 1.00                       |               |
|            | Genotype     | TT       | 34   | 52      | 0.60 (0.38–0.96)           | <b>0.033*</b> |
|            |              | TC       | 213  | 219     | 0.90 (0.69–1.16)           | 0.406         |
|            |              | CC       | 255  | 235     | 1.00                       |               |
|            | Dominant     | TT-TC    | 247  | 271     | 0.84 (0.66–1.08)           | 0.166         |
|            |              | CC       | 255  | 235     | 1.00                       |               |
|            | Recessive    | TT       | 34   | 52      | 0.63 (0.40–1.00)           | <b>0.028*</b> |
|            |              | TC-CC    | 468  | 454     | 1.00                       |               |
|            | Log-additive | -        | -    | -       | 0.83 (0.68–1.00)           | <b>0.032*</b> |
| rs7574865  | Allele       | T        | 289  | 328     | 0.84 (0.69–1.01)           | 0.063         |
|            |              | G        | 713  | 676     | 1.00                       |               |
|            | Genotype     | TT       | 37   | 51      | 0.65 (0.41–1.04)           | 0.071         |
|            |              | TG       | 215  | 226     | 0.86 (0.66–1.11)           | 0.253         |
|            |              | GG       | 249  | 225     | 1.00                       |               |
|            | Dominant     | TT-TG    | 252  | 277     | 0.82 (0.64–1.05)           | 0.121         |
|            |              | GG       | 249  | 225     | 1.00                       |               |
|            | Recessive    | TT       | 37   | 51      | 0.70 (0.45–1.10)           | 0.121         |
|            |              | TG-GG    | 464  | 451     | 1.00                       |               |
|            | Log-additive | -        | -    | -       | 0.83 (0.68–1.01)           | 0.059         |
| rs10174238 | Allele       | G        | 259  | 298     | 0.83 (0.68–1.01)           | 0.063         |
|            |              | A        | 739  | 706     | 1.00                       |               |
|            | Genotype     | GG       | 28   | 37      | 0.68 (0.40–1.15)           | 0.148         |
|            |              | GA       | 203  | 224     | 0.82 (0.63–1.06)           | 0.120         |
|            |              | AA       | 268  | 241     | 1.00                       |               |
|            | Dominant     | GG-GA    | 231  | 261     | 0.80 (0.62–1.02)           | 0.072         |
|            |              | AA       | 268  | 241     | 1.00                       |               |
|            | Recessive    | GG       | 28   | 37      | 0.75 (0.45–1.24)           | 0.260         |
|            |              | GA-AA    | 471  | 465     | 1.00                       |               |
|            | Log-additive | -        | -    | -       | 0.82 (0.67–1.00)           | 0.055         |

*P*<0.05 indicates statistical significance; “\*” and bold indicates statistical significance.

models (OR = 0.57, CI = 0.36–0.88, *P*=0.011). And rs10174238 also significantly reduced the HCC risk under the allele (OR = 0.61, CI = 0.39–0.96, *P*=0.033), heterozygote (OR = 0.53, CI = 0.29–0.98, *P*=0.041), dominant (OR = 0.52, CI = 0.29–0.91, *P*=0.024) and log-additive models (OR = 0.60, CI = 0.38–0.95, *P*=0.030).

### Differences in clinical indicators under different genotypes

We also evaluated the effects of four candidate STAT4 SNPs on the level of clinical indicators under different genotypes. These clinical indicators include carcinoembryonic antigen (CEA), serum ferritin (SF), tumor necrosis factor (TNF), carbohydrate antigen 50 (CA50), carbohydrate antigen 19-9 (CA19-9), carbohydrate antigen 125 (CA125),  $\alpha$ -fetoprotein (AFP). The results showed that Table 6) STAT4 rs11889341 (*P*=0.036) and rs7574865 (*P*=0.007) had significant differences in SF levels under different genotypes.

**Table 4 The SNPs of *STAT4* associated with susceptibility of hepatic carcinoma in the subgroup tests (age and gender)**

| SNP ID     | Model        | Genotype | Age, years       |                  |                  |                  | Gender           |                  |                  |                  |
|------------|--------------|----------|------------------|------------------|------------------|------------------|------------------|------------------|------------------|------------------|
|            |              |          | OR (95% CI)      | P                | OR (95% CI)      | P                | OR (95% CI)      | P                | OR (95% CI)      | P                |
|            |              |          | ≤55              |                  | >55              |                  | Female           |                  | Male             |                  |
| rs3821236  | Allele       | A        | 0.92 (0.72–1.17) | 0.505            | 0.94 (0.72–1.22) | 0.621            | 0.85 (0.58–1.24) | 0.387            | 0.95 (0.78–1.16) | 0.614            |
|            |              | G        | 1.00             |                  | 1.00             |                  | 1.00             |                  | 1.00             |                  |
|            | Genotype     | AA       | 0.82 (0.5–1.35)  | 0.438            | 0.71 (0.41–1.25) | 0.241            | 0.64 (0.30–1.36) | 0.246            | 0.82 (0.54–1.26) | 0.375            |
|            |              | AG       | 1.03 (0.7–1.52)  | 0.869            | 1.29 (0.87–1.92) | 0.207            | 1.21 (0.67–2.17) | 0.530            | 1.14 (0.83–1.55) | 0.418            |
|            |              | GG       | 1.00             |                  | 1.00             |                  | 1.00             |                  | 1.00             |                  |
|            |              | Dominant | AA-AG            | 0.97 (0.68–1.39) | 0.871            | 1.12 (0.77–1.63) | 0.546            | 1.00 (0.58–1.71) | 0.993            | 1.05 (0.78–1.41) |
|            | Recessive    | GG       | 1.00             |                  | 1.00             |                  | 1.00             |                  | 1.00             |                  |
|            |              | AA       | 0.81 (0.52–1.25) | 0.336            | 0.62 (0.37–1.04) | 0.071            | 0.58 (0.29–1.15) | 0.118            | 0.76 (0.52–1.12) | 0.169            |
|            | Log-additive | AG-GG    | 1.00             |                  | 1.00             |                  | 1.00             |                  | 1.00             |                  |
|            |              | -        | 0.92 (0.73–1.18) | 0.520            | 0.93 (0.72–1.22) | 0.610            | 0.86 (0.60–1.23) | 0.396            | 0.95 (0.77–1.16) | 0.612            |
| rs11889341 | Allele       | T        | 0.94 (0.73–1.22) | 0.640            | 0.72 (0.54–0.95) | <b>0.020*</b>    | 0.88 (0.59–1.32) | 0.539            | 0.81 (0.66–1.01) | <b>0.033*</b>    |
|            |              | C        | 1.00             |                  | 1.00             |                  | 1.00             |                  | 1.00             |                  |
|            | Genotype     | TT       | 0.80 (0.42–1.51) | 0.495            | 0.45 (0.22–0.90) | <b>0.024*</b>    | 0.64 (0.24–1.69) | 0.366            | 0.59 (0.35–1.01) | <b>0.013*</b>    |
|            |              | TC       | 1.03 (0.72–1.46) | 0.893            | 0.78 (0.53–1.14) | 0.193            | 1.00 (0.58–1.73) | 0.999            | 0.87 (0.65–1.16) | 0.341            |
|            |              | CC       | 1.00             |                  | 1.00             |                  | 1.00             |                  | 1.00             |                  |
|            |              | Dominant | TT-TC            | 0.99 (0.70–1.39) | 0.934            | 0.71 (0.49–1.02) | 0.063            | 0.93 (0.55–1.57) | 0.781            | 0.81 (0.62–1.08) |
|            | Recessive    | CC       | 1.00             |                  | 1.00             |                  | 1.00             |                  | 1.00             |                  |
|            |              | TT       | 0.79 (0.43–1.46) | 0.453            | 0.50 (0.25–0.99) | <b>0.045*</b>    | 0.64 (0.25–1.63) | 0.347            | 0.63 (0.38–1.06) | <b>0.042*</b>    |
|            | Log-additive | TC-CC    | 1.00             |                  | 1.00             |                  | 1.00             |                  | 1.00             |                  |
|            |              | -        | 0.95 (0.73–1.24) | 0.692            | 0.71 (0.54–0.95) | <b>0.020*</b>    | 0.88 (0.58–1.32) | 0.526            | 0.81 (0.65–1.01) | <b>0.041*</b>    |
| rs7574865  | Allele       | T        | 0.97 (0.75–1.25) | 0.805            | 0.70 (0.53–0.93) | <b>0.013*</b>    | 0.74 (0.50–1.11) | 0.145            | 0.86 (0.70–1.07) | 0.184            |
|            |              | G        | 1.00             |                  | 1.00             |                  | 1.00             |                  | 1.00             |                  |
|            | Genotype     | TT       | 0.99 (0.54–1.81) | 0.962            | 0.40 (0.19–0.83) | <b>0.014*</b>    | 0.64 (0.25–1.62) | 0.345            | 0.65 (0.38–1.11) | 0.115            |
|            |              | TG       | 0.96 (0.67–1.37) | 0.813            | 0.77 (0.52–1.12) | 0.173            | 0.63 (0.36–1.11) | 0.113            | 0.93 (0.69–1.25) | 0.635            |
|            |              | GG       | 1.00             |                  | 1.00             |                  | 1.00             |                  | 1.00             |                  |
|            |              | Dominant | TT-TG            | 0.96 (0.68–1.36) | 0.826            | 0.69 (0.48–1.00) | <b>0.045*</b>    | 0.63 (0.37–1.09) | 0.097            | 0.88 (0.66–1.17) |
|            | Recessive    | GG       | 1.00             |                  | 1.00             |                  | 1.00             |                  | 1.00             |                  |
|            |              | TT       | 1.01 (0.56–1.80) | 0.981            | 0.45 (0.22–0.92) | <b>0.028*</b>    | 0.80 (0.33–1.94) | 0.621            | 0.68 (0.40–1.13) | 0.133            |
|            | Log-additive | TG-GG    | 1.00             |                  | 1.00             |                  | 1.00             |                  | 1.00             |                  |
|            |              | -        | 0.98 (0.75–1.28) | 0.874            | 0.69 (0.52–0.92) | <b>0.013*</b>    | 0.73 (0.49–1.10) | 0.138            | 0.86 (0.69–1.07) | 0.175            |
| rs10174238 | Allele       | G        | 0.90 (0.69–1.17) | 0.421            | 0.76 (0.57–1.02) | 0.062            | 0.83 (0.54–1.27) | 0.383            | 0.83 (0.67–1.04) | 0.101            |
|            |              | A        | 1.00             |                  | 1.00             |                  | 1.00             |                  | 1.00             |                  |
|            | Genotype     | GG       | 1.07 (0.54–2.12) | 0.857            | 0.37 (0.15–0.87) | <b>0.023*</b>    | 0.75 (0.24–2.37) | 0.627            | 0.66 (0.37–1.19) | 0.170            |
|            |              | GA       | 0.78 (0.55–1.11) | 0.171            | 0.86 (0.59–1.26) | 0.442            | 0.77 (0.44–1.35) | 0.365            | 0.82 (0.62–1.10) | 0.194            |
|            |              | AA       | 1.00             |                  | 1.00             |                  | 1.00             |                  | 1.00             |                  |
|            |              | Dominant | GG-GA            | 0.81 (0.58–1.15) | 0.239            | 0.78 (0.54–1.13) | 0.184            | 0.77 (0.45–1.31) | 0.339            | 0.80 (0.60–1.06) |
|            | Recessive    | AA       | 1.00             |                  | 1.00             |                  | 1.00             |                  | 1.00             |                  |
|            |              | GG       | 1.20 (0.62–2.33) | 0.592            | 0.39 (0.17–0.91) | <b>0.030*</b>    | 0.84 (0.27–2.58) | 0.757            | 0.73 (0.41–1.28) | 0.271            |
|            | Log-additive | GA-AA    | 1.00             |                  | 1.00             |                  | 1.00             |                  | 1.00             |                  |
|            |              | -        | 0.90 (0.69–1.19) | 0.467            | 0.74 (0.54–1.00) | <b>0.045*</b>    | 0.82 (0.53–1.27) | 0.366            | 0.82 (0.65–1.03) | 0.089            |

$P < 0.05$  indicates statistical significance; ‘-’ indicates Log-additive model; ‘\*’ and bold indicates statistical significance.

**Table 5 The SNPs of *STAT4* associated with susceptibility of hepatic carcinoma in the subgroup tests (smoking and drinking)**

| SNP ID       | Model    | Genotype         | Smoking            |                  |                   |                  | Drinking           |                  |                   |               |
|--------------|----------|------------------|--------------------|------------------|-------------------|------------------|--------------------|------------------|-------------------|---------------|
|              |          |                  | OR (95% CI)<br>Yes | P                | OR (95% CI)<br>No | P                | OR (95% CI)<br>Yes | P                | OR (95% CI)<br>No | P             |
| rs3821236    | Allele   | A                | 0.77 (0.52–1.14)   | 0.186            | 0.79 (0.52–1.19)  | 0.253            | 1.03 (0.66–1.61)   | 0.903            | 0.73 (0.49–1.07)  | 0.109         |
|              |          | G                | 1.00               |                  | 1.00              |                  | 1.00               |                  | 1.00              |               |
|              | Genotype | AA               | 0.63 (0.29–1.41)   | 0.265            | 0.46 (0.18–1.17)  | 0.102            | 1.06 (0.42–2.71)   | 0.899            | 0.42 (0.18–0.96)  | 0.041         |
|              |          | AG               | 0.65 (0.35–1.20)   | 0.165            | 1.18 (0.63–2.20)  | 0.610            | 0.96 (0.47–1.95)   | 0.910            | 0.86 (0.47–1.57)  | 0.613         |
|              |          | GG               | 1.00               |                  | 1.00              |                  | 1.00               |                  | 1.00              |               |
|              | Dominant | AA-AG            | 0.64 (0.36–1.15)   | 0.134            | 0.93 (0.51–1.68)  | 0.806            | 0.99 (0.50–1.93)   | 0.965            | 0.70 (0.40–1.23)  | 0.218         |
|              |          | GG               | 1.00               |                  | 1.00              |                  | 1.00               |                  | 1.00              |               |
| Recessive    | AA       | 0.82 (0.40–1.67) | 0.579              | 0.42 (0.17–1.00) | 0.051             | 1.09 (0.47–2.51) | 0.841              | 0.46 (0.21–0.98) | 0.055             |               |
| AG-GG        | 1.00     |                  | 1.00               |                  | 1.00              |                  | 1.00               |                  |                   |               |
| Log-additive | -        | 0.77 (0.52–1.14) | 0.192              | 0.77 (0.52–1.16) | 0.218             | 1.02 (0.64–1.61) | 0.936              | 0.69 (0.47–1.01) | 0.057             |               |
| rs11889341   | Allele   | T                | 0.76 (0.50–1.16)   | 0.201            | 0.57 (0.36–0.91)  | 0.018            | 0.78 (0.47–1.28)   | 0.329            | 0.71 (0.47–1.09)  | 0.116         |
|              |          | C                | 1.00               |                  | 1.00              |                  | 1.00               |                  | 1.00              |               |
|              | Genotype | TT               | 0.70 (0.27–1.83)   | 0.470            | 0.27 (0.08–0.98)  | 0.046            | 0.61 (0.18–2.05)   | 0.420            | 0.52 (0.20–1.39)  | 0.192         |
|              |          | TC               | 0.63 (0.35–1.13)   | 0.121            | 0.66 (0.36–1.22)  | 0.188            | 0.73 (0.37–1.44)   | 0.365            | 0.68 (0.38–1.22)  | 0.197         |
|              |          | CC               | 1.00               |                  | 1.00              |                  | 1.00               |                  | 1.00              |               |
|              | Dominant | TT-TC            | 0.64 (0.37–1.12)   | 0.118            | 0.57 (0.32–1.02)  | 0.059            | 0.71 (0.37–1.35)   | 0.295            | 0.64 (0.37–1.12)  | 0.118         |
|              |          | CC               | 1.00               |                  | 1.00              |                  | 1.00               |                  | 1.00              |               |
| Recessive    | TT       | 0.87 (0.35–2.19) | 0.772              | 0.32 (0.09–1.13) | 0.077             | 0.70 (0.22–2.27) | 0.556              | 0.62 (0.24–1.58) | 0.315             |               |
| TC-CC        | 1.00     |                  | 1.00               |                  | 1.00              |                  | 1.00               |                  |                   |               |
| Log-additive | -        | 0.75 (0.49–1.15) | 0.190              | 0.59 (0.37–0.94) | <b>0.026*</b>     | 0.76 (0.46–1.26) | 0.286              | 0.71 (0.46–1.08) | 0.105             |               |
| rs7574865    | Allele   | T                | 0.77 (0.50–1.17)   | 0.220            | 0.51 (0.31–0.82)  | <b>0.005*</b>    | 0.87 (0.53–1.41)   | 0.573            | 0.58 (0.38–0.90)  | <b>0.013*</b> |
|              |          | G                | 1.00               |                  | 1.00              |                  | 1.00               |                  | 1.00              |               |
|              | Genotype | TT               | 0.67 (0.26–1.73)   | 0.403            | 0.26 (0.07–0.92)  | <b>0.037*</b>    | 0.75 (0.24–2.31)   | 0.617            | 0.40 (0.14–1.12)  | 0.081         |
|              |          | TG               | 0.68 (0.38–1.22)   | 0.197            | 0.55 (0.29–1.01)  | 0.055            | 0.83 (0.42–1.63)   | 0.582            | 0.49 (0.27–0.89)  | <b>0.018*</b> |
|              |          | GG               | 1.00               |                  | 1.00              |                  | 1.00               |                  | 1.00              |               |
|              | Dominant | TT-TG            | 0.68 (0.39–1.18)   | 0.169            | 0.48 (0.27–0.86)  | <b>0.014*</b>    | 0.81 (0.43–1.54)   | 0.524            | 0.47 (0.27–0.82)  | <b>0.008*</b> |
|              |          | GG               | 1.00               |                  | 1.00              |                  | 1.00               |                  | 1.00              |               |
| Recessive    | TT       | 0.80 (0.32–1.99) | 0.634              | 0.33 (0.09–1.15) | 0.081             | 0.82 (0.28–2.41) | 0.721              | 0.54 (0.20–1.47) | 0.226             |               |
| TG-GG        | 1.00     |                  | 1.00               |                  | 1.00              |                  | 1.00               |                  |                   |               |
| Log-additive | -        | 0.76 (0.50–1.17) | 0.211              | 0.53 (0.33–0.85) | <b>0.008*</b>     | 0.85 (0.52–1.39) | 0.520              | 0.57 (0.36–0.88) | <b>0.011*</b>     |               |
| rs10174238   | Allele   | G                | 0.76 (0.50–1.17)   | 0.210            | 0.55 (0.33–0.90)  | <b>0.017*</b>    | 0.81 (0.49–1.34)   | 0.421            | 0.61 (0.39–0.96)  | <b>0.033*</b> |
|              |          | A                | 1.00               |                  | 1.00              |                  | 1.00               |                  | 1.00              |               |
|              | Genotype | GG               | 0.61 (0.21–1.73)   | 0.349            | 0.42 (0.11–1.57)  | 0.197            | 0.85 (0.24–3.05)   | 0.807            | 0.45 (0.15–1.35)  | 0.155         |
|              |          | GA               | 0.71 (0.39–1.26)   | 0.241            | 0.50 (0.27–0.95)  | <b>0.034*</b>    | 0.65 (0.33–1.27)   | 0.206            | 0.53 (0.29–0.98)  | <b>0.041*</b> |
|              |          | AA               | 1.00               |                  | 1.00              |                  | 1.00               |                  | 1.00              |               |
|              | Dominant | GG-GA            | 0.69 (0.39–1.20)   | 0.190            | 0.49 (0.27–0.90)  | <b>0.021*</b>    | 0.67 (0.35–1.29)   | 0.230            | 0.52 (0.29–0.91)  | <b>0.024*</b> |
|              |          | AA               | 1.00               |                  | 1.00              |                  | 1.00               |                  | 1.00              |               |
| Recessive    | GG       | 0.72 (0.26–1.98) | 0.522              | 0.55 (0.15–2.01) | 0.369             | 1.06 (0.31–3.62) | 0.928              | 0.58 (0.20–1.70) | 0.318             |               |
| GA-AA        | 1.00     |                  | 1.00               |                  | 1.00              |                  | 1.00               |                  |                   |               |
| Log-additive | -        | 0.75 (0.48–1.16) | 0.193              | 0.56 (0.34–0.94) | <b>0.027*</b>     | 0.78 (0.45–1.33) | 0.351              | 0.60 (0.38–0.95) | <b>0.030*</b>     |               |

*P* < 0.05 indicates statistical significance. '-' indicates Log-additive model; '\*' and bold indicates statistical significance.

**Table 6 Clinical characteristics of patients based on the genotypes of selected SNPs**

| Characteristics | rs3821236     |                |               |       | rs11889341     |               |              |               |
|-----------------|---------------|----------------|---------------|-------|----------------|---------------|--------------|---------------|
|                 | AA            | AG             | GG            | P     | TT             | TC            | CC           | P             |
| CEA (ng/ml)     | 10.64 ± 1.29  | 14.47 ± 1.65   | 15.73 ± 1.11  | 0.197 | 15.28 ± 4.68   | 13.9 ± 2.02   | 14.5 ± 0.72  | 0.917         |
| SF (ng/ml)      | 94.07 ± 7.47  | 90.89 ± 1.93   | 89.63 ± 1.96  | 0.675 | 105.02 ± 13.79 | 91.26 ± 2.55  | 88.77 ± 1.46 | <b>0.036*</b> |
| TNF (mol/ml)    | 0.9 ± 0.01    | 0.9 ± 0.01     | 0.89 ± 0.01   | 0.786 | 0.89 ± 0.02    | 0.89 ± 0.01   | 0.9 ± 0.01   | 0.668         |
| CA50 (U/ml)     | 7.08 ± 1.37   | 10.55 ± 1.9    | 8.6 ± 1.38    | 0.507 | 9.41 ± 1.83    | 8.62 ± 1.58   | 9.7 ± 1.65   | 0.901         |
| CA125 (U/ml)    | 77.74 ± 24.58 | 104.69 ± 19.06 | 85.02 ± 19.17 | 0.654 | 45.29 ± 30.97  | 98.93 ± 20.6  | 88.5 ± 15.2  | 0.638         |
| CA199 (U/ml)    | 32.31 ± 5.19  | 60.78 ± 10.6   | 58.1 ± 10.13  | 0.290 | 48.66 ± 12.24  | 50.27 ± 10.83 | 60.04 ± 8.95 | 0.737         |
| AFP (ng/ml)     | 45.65 ± 21.08 | 34.68 ± 7.77   | 62.62 ± 13.69 | 0.200 | 82.65 ± 44.18  | 35.11 ± 9.02  | 49.8 ± 9.67  | 0.201         |

  

| Characteristics | rs7574865      |               |              |               | rs10174238    |               |               |       |
|-----------------|----------------|---------------|--------------|---------------|---------------|---------------|---------------|-------|
|                 | TT             | TG            | GG           | p             | GG            | GA            | AA            | P     |
| CEA (ng/ml)     | 13.1 ± 4.05    | 12.55 ± 1.08  | 14.56 ± 0.73 | 0.358         | 15.82 ± 1.48  | 12.52 ± 0.99  | 11.26 ± 3.48  | 0.179 |
| SF (ng/ml)      | 105.02 ± 13.79 | 87.58 ± 1.7   | 89.62 ± 1.22 | <b>0.007*</b> | 91.18 ± 1.88  | 90.63 ± 2.97  | 89.63 ± 3.25  | 0.975 |
| TNF (mol/ml)    | 0.89 ± 0.02    | 0.89 ± 0.01   | 0.9 ± 0.01   | 0.871         | 0.9 ± 0.01    | 0.9 ± 0.01    | 0.87 ± 0.02   | 0.543 |
| CA50 (U/ml)     | 9.41 ± 1.83    | 8.18 ± 1.46   | 9.8 ± 1.76   | 0.788         | 8.48 ± 1.07   | 10.6 ± 2.29   | 9.91 ± 3.09   | 0.646 |
| CA125 (U/ml)    | 44.41 ± 22.55  | 103.97 ± 21.1 | 88.41 ± 15.7 | 0.469         | 86.77 ± 14.08 | 108.1 ± 23.55 | 58.76 ± 31.2  | 0.576 |
| CA199 (U/ml)    | 42.94 ± 11.41  | 50.38 ± 10.65 | 61.25 ± 9.39 | 0.611         | 58.95 ± 8.55  | 53.41 ± 11    | 34.47 ± 12.53 | 0.663 |
| AFP (ng/ml)     | 70.67 ± 38.49  | 40.26 ± 9.84  | 48.15 ± 9.68 | 0.507         | 45.92 ± 9.2   | 50.37 ± 12.15 | 16.83 ± 10.83 | 0.567 |

AFP, alpha-fetoprotein; CA19-9, carbohydrate antigen 19-9; CA50, carbohydrate antigen 50; CA125, carbohydrate antigen 125; CEA, carcinoembryonic antigen; SF, serum ferritin; TNF, tumor necrosis factor; \*\* and bold indicates statistical significance.

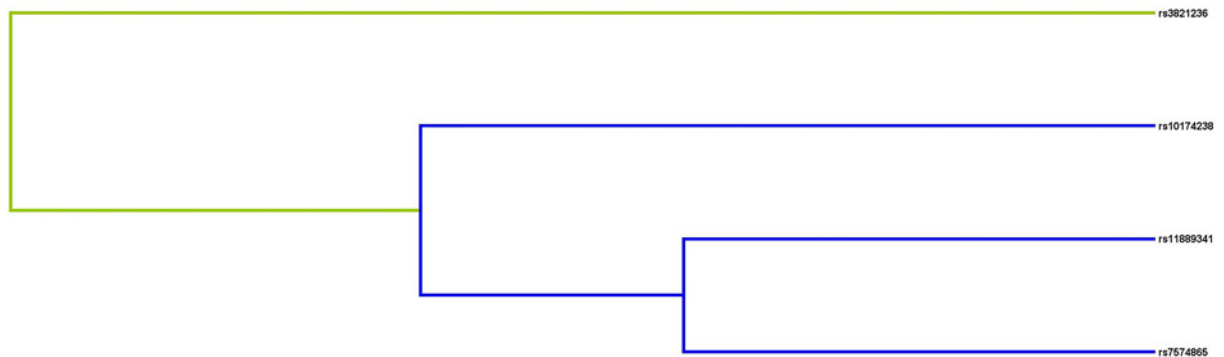

**Figure 1. Dendrogram analysis of SNP-SNP interaction**  
 The colors in the tree diagram represent synergy (yellow) or redundancy (blue).

### Analysis of MDR

We used MDR to analyze and evaluate the interaction of candidate SNPs in HCC risk among participants. Figure 1 was a dendrogram analysis of SNP-SNP interaction. The blue line in Figure 1 indicated that candidate SNPs have redundant effects in regulating HCC susceptibility, and the yellow line indicated synergy effects. The results were shown in Table 7. The best two-site model for predicting the HCC risk is: rs3821236, rs11889341 (testing accuracy = 0.512, cross-validation consistency = 8/10,  $P=0.0004$ ); the three-site model is: rs11889341, rs7574865, rs10174238 (testing accuracy = 0.523, cross-validation consistency = 8/10,  $P=0.0003$ ); the four-site model is: rs3821236, rs11889341, rs7574865, rs10174238 (testing accuracy = 0.527, cross-validation consistency = 10/10,  $P<0.0001$ ). The interaction of ‘SNP-SNP’ in different loci model combinations can be seen in Figures 2-5. Among them, light gray lattice represented a low risk of HCC, dark gray lattice represented a high risk of HCC and no color filled lattice represented no data. The results revealed that the effect of four candidate SNPs on HCC risk may be interdependent.

### Haplotype analysis

The results of LD and haplotype analysis of STAT4 polymorphism showed (Figure 6): there is an LD block ( $D' = 0.976$ ,



**Table 7 SNP–SNP interaction models analyzed by the MDR method**

| Model                                        | Training Bal. Acc | Testing Bal. Acc | OR (95% CI)      | P-value           | CVC   |
|----------------------------------------------|-------------------|------------------|------------------|-------------------|-------|
| rs3821236                                    | 0.533             | 0.482            | 1.25 (0.98–1.60) | 0.0779            | 5/10  |
| rs3821236, rs11889341                        | 0.546             | 0.512            | 1.74 (1.28–2.36) | <b>0.0004</b>     | 8/10  |
| rs11889341, rs7574865, rs10174238            | 0.559             | 0.523            | 1.59 (1.24–2.04) | <b>0.0003</b>     | 8/10  |
| rs3821236, rs11889341, rs7574865, rs10174238 | 0.570             | 0.527            | 2.18 (1.61–2.94) | <b>&lt;0.0001</b> | 10/10 |

Abbreviations: Bal. Acc., balanced accuracy; CVC, cross-validation consistency. P-values were calculated using  $\chi^2$  tests;  $P < 0.05$  indicates statistical significance; bold indicates statistical significance.

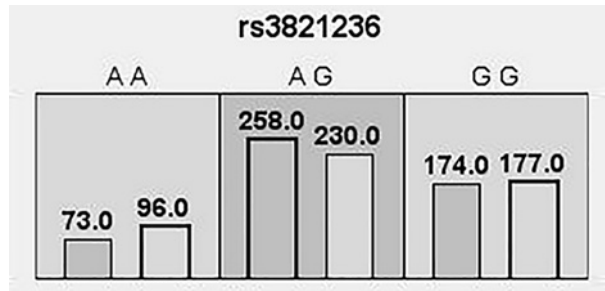

**Figure 2. MDR analysis of STAT4 rs3821236 interaction**

In each box, the left bar represents cases and the right bar represents controls. The light gray lattice indicates the low risk of HCC and dark gray lattice indicates the high risk of HCC, the empty lattice means no data.

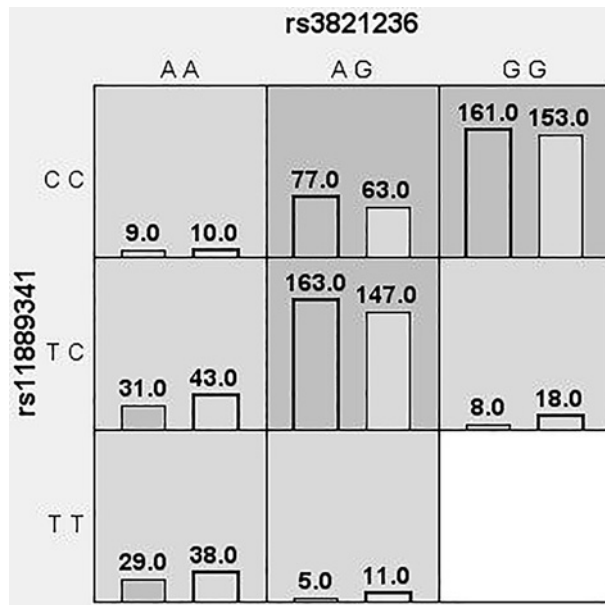

**Figure 3. MDR analysis of STAT4 rs3821236–rs11889341 interaction**

In each box, the left bar represents cases and the right bar represents controls. The light gray lattice indicates the low risk of HCC and dark gray lattice indicates the high risk of HCC, the empty lattice means no data.

$R^2 = 0.919$ ) composed of two SNPs (rs11889341 and rs7574865). Table 8 summarized the frequency of haplotypes formed by STAT4 genetic polymorphisms in the case and control groups. In haplotype analysis, the covariates (age and gender) were adjusted. Logistic regression results showed that the haplotype ‘TT’ (rs11889341|rs7574865) can reduce the susceptibility of HCC among participants (crude analysis: OR = 0.81, CI = 0.66–0.99,  $P = 0.037$ ; adjusted by age and gender: OR = 0.81, CI = 0.66–0.99,  $P = 0.130$ ).

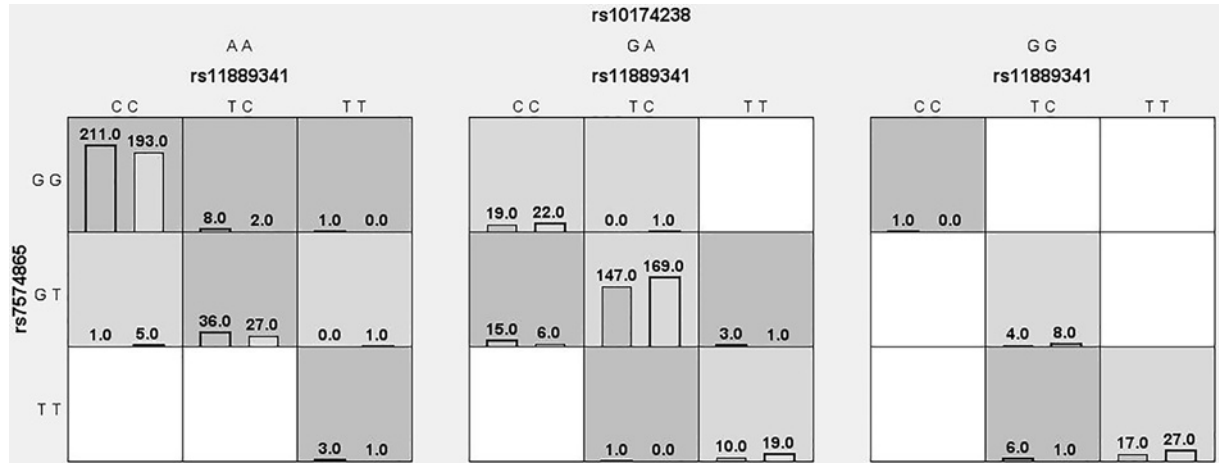

**Figure 4. MDR analysis of STAT4 rs11889341–rs7574865–rs10174238 interaction**  
 In each box, the left bar represents cases and the right bar represents controls. The light gray lattice indicates the low risk of HCC and dark gray lattice indicates the high risk of HCC, the empty lattice means no data.

**Table 8 Haplotype frequencies and the association with the risk of HCC**

| Chromosome | Gene  | SNP                  | Haplotype | Frequency |          | Crude analysis   |               | Adjusted by age and gender |               |
|------------|-------|----------------------|-----------|-----------|----------|------------------|---------------|----------------------------|---------------|
|            |       |                      |           | Cases     | Controls | OR (95% CI)      | P             | OR (95% CI)                | P             |
| Chr2       | STAT4 | rs11889341 rs7574865 | CG        | 0.697     | 0.668    | 1.00             | -             | 1.00                       | -             |
|            |       | rs11889341 rs7574865 | TT        | 0.266     | 0.314    | 0.81 (0.66–0.99) | <b>0.036*</b> | 0.81 (0.66–0.99)           | <b>0.037*</b> |
|            |       | rs11889341 rs7574865 | CT        | 0.023     | 0.013    | 1.71 (0.85–3.42) | 0.130         | 1.71 (0.85–3.44)           | 0.130         |

*P* < 0.05 indicates statistical significance; '\*' and bold indicates statistical significance.

## Discussion

Studies have confirmed that individual genetic variation affects the occurrence and development of HCC [16]. STAT4 is an important transcriptional activator of JAK/STAT signaling pathway, and plays an important role in the body's immune response, antiviral infection, and promotion of tumor cell invasion and metastasis. STAT4 may be a breakthrough in the prevention and treatment of HCC [17]. Therefore, in-depth study of STAT4 gene polymorphisms, function and expression will help to understand the mechanism of occurrence and development of HCC, and also provide a theoretical basis for the treatment and prevention of HCC.

Our study conducted a 'case-control' study among the Chinese Han population. In general, only STAT4 rs11889341 has a significant association with the HCC risk in the present study subjects under multiple genetic models (homozygote: *P* = 0.033; recessive: *P* = 0.028; log-additive: *P* = 0.032), and it has shown the ability to reduce the HCC risk. The remaining three candidate SNPs were not associated with the HCC risk in the study subjects. As far as we know, we are the first to report that STAT4 rs11889341 is associated with disease risk.

In previous studies, the association between STAT4 rs7574865 and HCC risk has been reported many times [18–20]. But our results are not exactly the same as previous studies. In the overall analysis, rs7574865 was not associated with HCC susceptibility among participants. But in the subgroup analysis, it showed the ability to reduce the HCC susceptibility among specific population (participants older than 55 years, non-smokers or non-drinking alcohol). The results of our study are similar to previous studies: Chen et al. have reported that rs7574865 (OR = 0.79) is associated with a reduction in the risk of HCC [14]. However, a meta-analysis of eight studies revealed that the rs7574865 polymorphism may be used as one of the risk factors for HCC [15], which is contrary to the results of our study. We speculate that the reasons for the above differences may be caused by differences in sample size or genetic background. In any case, our study once again verified that there is a certain association between STAT4 rs7574865 and HCC susceptibility.

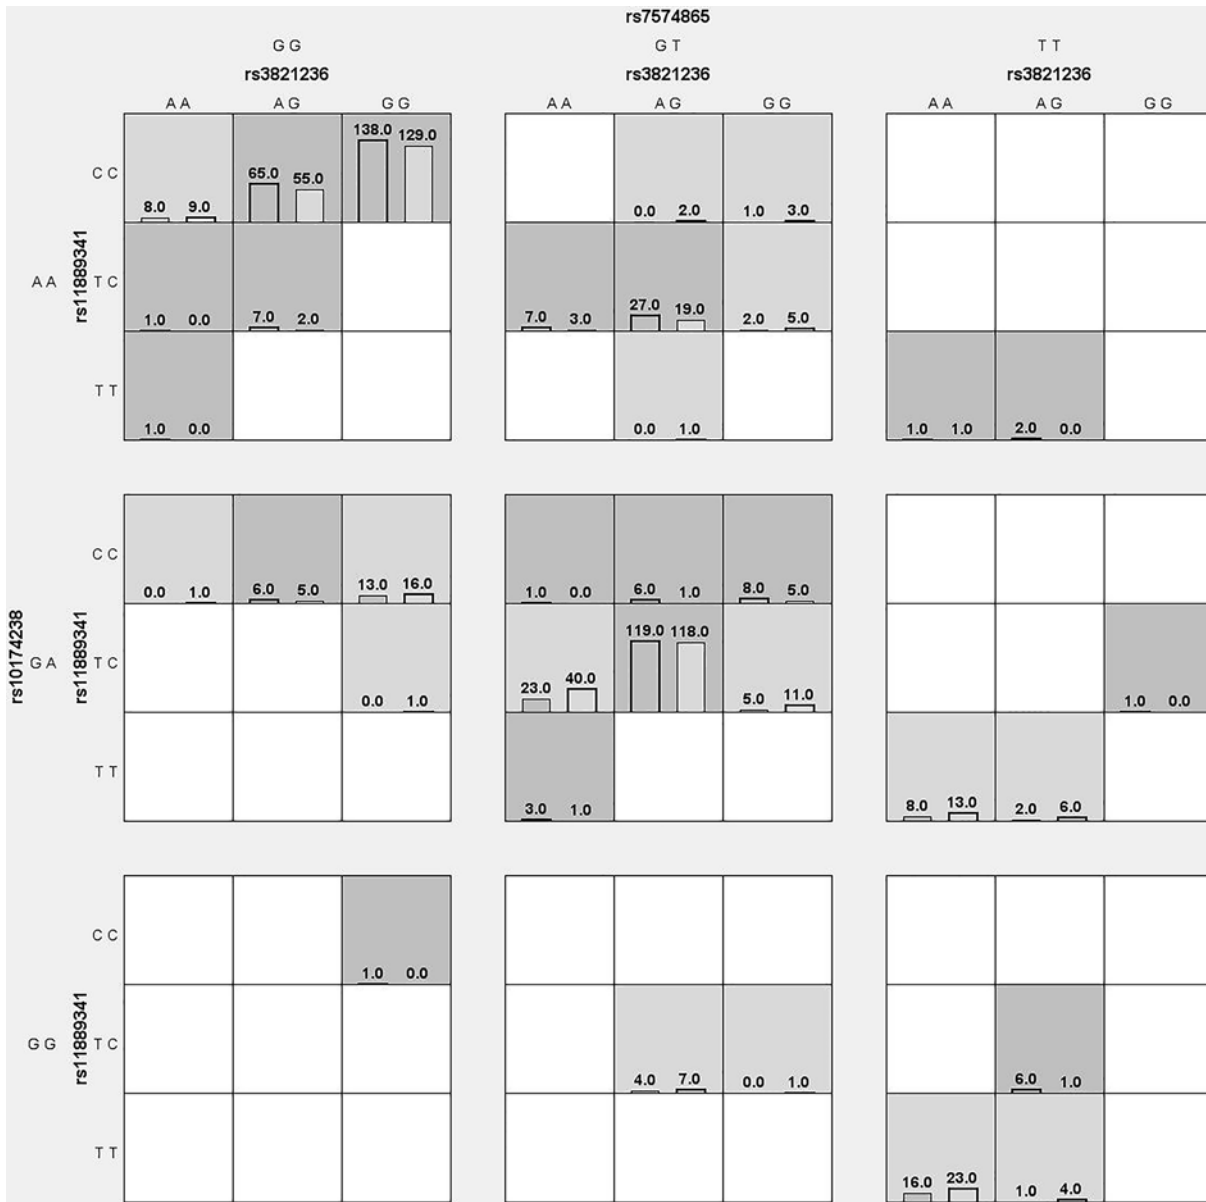

**Figure 5. MDR analysis of STAT4 rs3821236–rs11889341–rs7574865–rs10174238 interaction**

In each box, the left bar represents cases and the right bar represents controls. The light gray lattice indicates the low risk of HCC and dark gray lattice indicates the high risk of HCC, the empty lattice means no data.

In previous studies, factors related to the risk of HCC included aging [21], smoking [22–24] and alcohol consumption [22,25,26]. And some studies have reported that there are gender differences in the incidence of HCC [27,28]. Therefore, we also divided the study subjects according to the current epidemiological characteristics of HCC or the difference in risk of incidence (age, gender, smoking/drinking status). Then, we analyzed the association between candidate SNPs and HCC risk in subgroups, with a view to provide a valuable reference for the prediction or evaluation of HCC risk in specific populations. Our results showed that STAT4 rs11889341 is significantly associated with reduction in HCC risk among participants who were older than 55 years, male or non-smoker. Both rs7574865 and rs10174238 were significantly associated with reduction in HCC risk among participants who were older than 55 years, did not smoke or drink alcohol. On the one hand, previous studies have confirmed that the incidence of HCC among non-smokers/drinkers is lower than that among smokers/drinkers [22,29]. Combined with the results of our study, we speculate that STAT4 rs11889341, rs7574865 or rs10174238 may inhibit HCC among non-smoking or

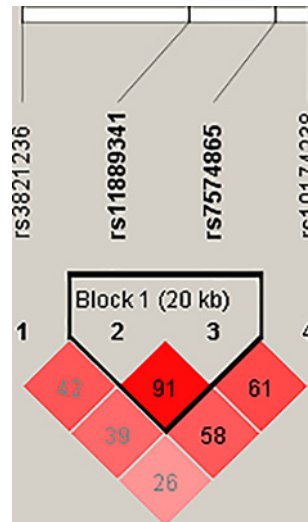

**Figure 6. LD plots containing four polymorphisms from STAT4**

The lighter the color, the lower the degree of linkage. The numbers inside the diamonds indicate the  $D'$  for pairwise analyses.

non-drinking participants. But their specific mechanism in HCC needs further experimental to verify. On the other hand, rs11889341 was significantly associated with reduction in HCC risk among potentially HCC-susceptible populations (older than 55 years old/male participants) in the present study. It has been confirmed that older population [21] or males [28] are more likely to develop HCC. Based on this, we speculate that STAT4 rs11889341 may be a protective factor for HCC in the Chinese Han population, and this protective effect may not be affected by non-biological risk factors. However, a large sample size and further verification tests are necessary to ensure the accuracy of our results. Nevertheless, our study is the first report on the potential association between STAT4 rs11889341, rs7574865 or rs10174238 and HCC risk among Chinese Han population. Our study has provided new evidence for predicting the targeted therapy of HCC and the exact molecular mechanism of STAT4 in the occurrence and development of HCC, and also provided new ideas for the role of STAT4 in the prevention and treatment of HCC.

STAT4 is an important transcriptional activator. After activation, it crosses the nuclear membrane into the nucleus in the form of a homodimer and initiates the transcription and expression of downstream target genes [30]. Studies have shown that STAT4 is involved in the occurrence and development of HCC and other tumors, and the abnormal expression of STAT4 is closely related to tumor metastasis and prognosis [10,11]. Studies have also shown that chemotherapy-induced STAT4 deficiency can help lymphoma patients transplanted with peripheral blood stem cells to produce IFN- $\gamma$ , thereby inhibiting the growth of tumor cells [31]. Based on the above studies, the expression level of STAT4 can directly affect the occurrence and development of tumors. Combined with the results of our study, rs11889341, rs7574865 or rs10174238 and the reduction in HCC risk among the participants may be caused by these genetic variants affecting the expression level of STAT4. We may be able to start with the effect of these variants on the expression level of STAT4 in the occurrence and development of HCC, and further explore the molecular mechanism of STAT4 in the occurrence and development of HCC. We believe it will be very interesting.

SF as a potential cancer marker has been confirmed by many studies [32,33]. Although there were studies found that SF levels may not play a role in the identification and diagnosis of HCC [34,35], other studies have also shown that it may be a marker for monitoring chemotherapy response in patients with HCC [33]. Facciorusso et al. also found that the prognosis of HCC patients with higher SF levels was poor [36]. In this study, we found that the SF levels under different genotypes of STAT4 rs11889341, rs7574865 had significant differences. Combined with previous studies, our results suggest that genetic variants in STAT4 can affect SF levels, thereby affecting the risk of HCC. Our study may provide a new reference for clinical monitoring of HCC.

Our study provides data supplements for the study of association between STAT4 gene polymorphisms and HCC risk in Chinese Han population. In particular, rs11889341 showed an outstanding and significant association with the risk of HCC. However, we must face the fact that the present study has certain limitations. In order to increase the reliability and repeatability of the results, a large sample size is indeed necessary. At present, only a small part of STAT4 genetic sites associated with the risk of HCC have been discovered, and there are more genetic susceptibility

sites/regions that need new research to discover. With the continuous exploration of the susceptible sites of HCC in the future, it is of great help for individualized treatment and diagnosis of HCC in clinic.

## Conclusion

In summary, we found that STAT4 rs11889341, rs7574865 or rs10174238 had a potential association with the reduction in HCC risk in Chinese Han population. Especially rs11889341, whether in the overall analysis or subgroup analysis, it has significant association with reducing the risk of HCC.

## Data Availability

The datasets used and analyzed in the current study are available from the corresponding author on reasonable request.

## Competing Interests

The authors declare that there are no competing interests associated with the manuscript.

## Funding

This work was supported by the Subject Innovation Team of the Second Hospital Affiliated Shaanxi University of Chinese Medicine [grant number 2020XKTD-A01]; Outstanding Innovation Team of Shaanxi University of Chinese Medicine [grant number ZYTD-01]; and the Subject Innovation Team of Shaanxi University of Chinese Medicine [grant number 2019-YS05].

## CRedit Author Contribution

**Xu Chao:** Methodology, Writing—original draft, Writing—review and editing. **Jieqiong Wu:** Software. **Wei Zhang:** Software. **Xuesong Feng:** Software. **Luyan Zhao:** Data curation. **Feng Huang:** Data curation. **Chao Jiang:** Conceptualization, Writing—review and editing.

## Ethics Approval and Consent to Participate

The present study was approved by the Ethics Committee of the Shaanxi University of Chinese Medicine, and conformed to the ethical principles for medical research involving humans of the World Medical Association Declaration of Helsinki. All participants signed informed consent forms before participating in the present study.

## Acknowledgements

We thank all authors for their contribution and support. We are also grateful to all participants for providing blood samples.

## Abbreviations

CI, confidence interval; HBV, hepatitis B virus; HCC, hepatocellular carcinoma; LD, linkage disequilibrium; MDR, multifactorial dimension reduction; OR, odds ratio; SF, serum ferritin; SNP, single nucleotide polymorphism; STAT4, signal transducer and activator of transcription 4.

## References

- 1 Bray, F., Ferlay, J., Soerjomataram, I., Siegel, R.L., Torre, L.A. and Jemal, A. (2018) Global cancer statistics 2018: GLOBOCAN estimates of incidence and mortality worldwide for 36 cancers in 185 countries. *CA Cancer J. Clin.* **68**, 394–424, <https://doi.org/10.3322/caac.21492>
- 2 Van Hees, S., Michielsen, P. and Vanwolleghem, T. (2016) Circulating predictive and diagnostic biomarkers for hepatitis B virus-associated hepatocellular carcinoma. *World J. Gastroenterol.* **22**, 8271–8282, <https://doi.org/10.3748/wjg.v22.i37.8271>
- 3 Wang, K., Jiang, G., Jia, Z., Zhu, X. and Ni, C. (2018) Effects of transarterial chemoembolization combined with antiviral therapy on HBV reactivation and liver function in HBV-related hepatocellular carcinoma patients with HBV-DNA negative. *Medicine (Baltimore)* **97**, e10940, <https://doi.org/10.1097/MD.00000000000010940>
- 4 Yoon, C.H., Jin, Y.J. and Lee, J.W. (2018) Nonalcoholic fatty liver disease-associated hepatocellular carcinoma in a hepatitis B virus-endemic area. *Eur. J. Gastroenterol. Hepatol.* **30**, 1090–1096, <https://doi.org/10.1097/MEG.0000000000001174>
- 5 Cai, J. and Chen, L. (2019) Genome-wide mapping of 5-hydroxymethylcytosines in circulating cell-free DNA as a non-invasive approach for early detection of hepatocellular carcinoma. *Gut*. **68**, 2195–2205, <https://doi.org/10.1136/gutjnl-2019-318882>
- 6 Jiang, D.K., Sun, J., Cao, G., Liu, Y., Lin, D., Gao, Y.Z. et al. (2013) Genetic variants in STAT4 and HLA-DQ genes confer risk of hepatitis B virus-related hepatocellular carcinoma. *Nat. Genet.* **45**, 72–75, <https://doi.org/10.1038/ng.2483>
- 7 Liu, W.C., Wu, I.C., Lee, Y.C., Lin, C.P., Cheng, J.H., Lin, Y.J. et al. (2017) Hepatocellular carcinoma-associated single-nucleotide variants and deletions identified by the use of genome-wide high-throughput analysis of hepatitis B virus. *J. Pathol.* **243**, 176–192, <https://doi.org/10.1002/path.4938>

- 8 O'Shea, J.J., Holland, S.M. and Staudt, L.M. (2013) JAKs and STATs in immunity, immunodeficiency, and cancer. *N. Engl. J. Med.* **368**, 161–170, <https://doi.org/10.1056/NEJMra1202117>
- 9 Glosson-Byers, N.L., Sehra, S. and Kaplan, M.H. (2014) STAT4 is required for IL-23 responsiveness in Th17 memory cells and NKT cells. *JAKSTAT* **3**, e955393, <https://doi.org/10.4161/21623988.2014.955393>
- 10 Zhao, L., Ji, G., Le, X., Luo, Z., Wang, C., Feng, M. et al. (2017) An integrated analysis identifies STAT4 as a key regulator of ovarian cancer metastasis. *Oncogene* **36**, 3384–3396, <https://doi.org/10.1038/onc.2016.487>
- 11 Wubetu, G.Y., Utsunomiya, T., Ishikawa, D., Yamada, S., Ikemoto, T., Morine, Y. et al. (2014) High STAT4 expression is a better prognostic indicator in patients with hepatocellular carcinoma after hepatectomy. *Ann. Surg. Oncol.* **21**, S721–S728, <https://doi.org/10.1245/s10434-014-3861-9>
- 12 Xiao, Y., Liu, G. and Gong, L. (2018) Systematic review and meta-analysis on the association between polymorphisms in genes of IL-12 signaling pathway and hepatocellular carcinoma risk. *J. Cancer* **9**, 3583–3592, <https://doi.org/10.7150/jca.26419>
- 13 Zhao, X., Jiang, K., Liang, B. and Huang, X. (2015) STAT4 gene polymorphism and risk of chronic hepatitis B-induced hepatocellular carcinoma. *Cell Biochem. Biophys.* **71**, 353–357, <https://doi.org/10.1007/s12013-014-0205-0>
- 14 Chen, W., Wang, M., Zhang, Z., Tang, H., Zuo, X., Meng, X. et al. (2015) Replication the association of 2q32.2-q32.3 and 14q32.11 with hepatocellular carcinoma. *Gene* **561**, 63–67, <https://doi.org/10.1016/j.gene.2015.02.006>
- 15 Zhang, L., Xu, K., Liu, C. and Chen, J. (2017) Meta-analysis reveals an association between signal transducer and activator of transcription-4 polymorphism and hepatocellular carcinoma risk. *Hepatol. Res.* **47**, 303–311, <https://doi.org/10.1111/hepr.12733>
- 16 Gao, J., Xie, L., Yang, W.S., Zhang, W., Gao, S., Wang, J. et al. (2012) Risk factors of hepatocellular carcinoma—current status and perspectives. *Asian Pac. J. Cancer Prev.* **13**, 743–752, <https://doi.org/10.7314/APJCP.2012.13.3.743>
- 17 Godin-Ethier, J., Hanafi, L.A., Piccirillo, C.A. and Lapointe, R. (2011) Indoleamine 2,3-dioxygenase expression in human cancers: clinical and immunologic perspectives. *Clin. Cancer Res.* **17**, 6985–6991, <https://doi.org/10.1158/1078-0432.CCR-11-1331>
- 18 Shi, H., He, H., Ojha, S.C., Sun, C., Fu, J., Yan, M. et al. (2019) Association of STAT3 and STAT4 polymorphisms with susceptibility to chronic hepatitis B virus infection and risk of hepatocellular carcinoma: a meta-analysis. *Biosci Rep.* **39**, <https://doi.org/10.1042/BSR20190783>
- 19 Clark, A., Gerlach, F., Tong, H., Hoan, N.X., Song, H., Toan, N.L. et al. (2013) A trivial role of STAT4 variant in chronic hepatitis B induced hepatocellular carcinoma. *Infect. Genet. Evol.* **18**, 257–261, <https://doi.org/10.1016/j.meegid.2013.05.025>
- 20 Chanthra, N., Payungporn, S., Chuaypen, N., Piratanantatavorn, K., Pinjaroen, N., Poovorawan, Y. et al. (2015) Single nucleotide polymorphisms in STAT3 and STAT4 and risk of hepatocellular carcinoma in Thai patients with chronic hepatitis B. *Asian Pac. J. Cancer Prev.* **16**, 8405–8410, <https://doi.org/10.7314/APJCP.2015.16.18.8405>
- 21 Yang, J.D., Hainaut, P. and Gores, G.J. (2019) A global view of hepatocellular carcinoma: trends, risk, prevention and management. *Nat. Rev. Gastroenterol. Hepatol.* **16**, 589–604, <https://doi.org/10.1038/s41575-019-0186-y>
- 22 Petrick, J.L., Campbell, P.T., Koshiol, J., Thistle, J.E., Andreotti, G., Beane-Freeman, L.E. et al. (2018) Tobacco, alcohol use and risk of hepatocellular carcinoma and intrahepatic cholangiocarcinoma: The Liver Cancer Pooling Project. *Br. J. Cancer* **118**, 1005–1012, <https://doi.org/10.1038/s41416-018-0007-z>
- 23 Azzalini, L., Ferrer, E., Ramalho, L.N., Moreno, M., Dominguez, M., Colmenero, J. et al. (2010) Cigarette smoking exacerbates nonalcoholic fatty liver disease in obese rats. *Hepatology* **51**, 1567–1576, <https://doi.org/10.1002/hep.23516>
- 24 Benowitz, N.L., Hukkanen, J. and Jacob, III, P. (2009) Nicotine chemistry, metabolism, kinetics and biomarkers. *Handb. Exp. Pharmacol.* **192**, 29–60, [https://doi.org/10.1007/978-3-540-69248-5\\_2](https://doi.org/10.1007/978-3-540-69248-5_2)
- 25 Turati, F., Galeone, C., Rota, M., Pelucchi, C., Negri, E., Bagnardi, V. et al. (2014) Alcohol and liver cancer: a systematic review and meta-analysis of prospective studies. *Ann. Oncol.* **25**, 1526–1535, <https://doi.org/10.1093/annonc/mdu020>
- 26 Bagnardi, V., Rota, M., Botteri, E., Tramacere, I., Islami, F., Fedirko, V. et al. (2015) Alcohol consumption and site-specific cancer risk: a comprehensive dose-response meta-analysis. *Br. J. Cancer* **112**, 580–593, <https://doi.org/10.1038/bjc.2014.579>
- 27 Torre, L.A., Bray, F., Siegel, R.L., Ferlay, J., Lortet-Tieulent, J. and Jemal, A. (2015) Global cancer statistics, 2012. *CA Cancer J. Clin.* **65**, 87–108, <https://doi.org/10.3322/caac.21262>
- 28 An, P., Xu, J., Yu, Y. and Winkler, C.A. (2018) Host and viral genetic variation in HBV-related hepatocellular carcinoma. *Front. Genet.* **9**, 261, <https://doi.org/10.3389/fgene.2018.00261>
- 29 Park, J.W., Chen, M., Colombo, M., Roberts, L.R., Schwartz, M., Chen, P.J. et al. (2015) Global patterns of hepatocellular carcinoma management from diagnosis to death: the BRIDGE Study. *Liver Int.* **35**, 2155–2166, <https://doi.org/10.1111/liv.12818>
- 30 Ignacio, A., Breda, C.N.S. and Camara, N.O.S. (2017) Innate lymphoid cells in tissue homeostasis and diseases. *World J. Hepatol.* **9**, 979–989, <https://doi.org/10.4254/wjh.v9.i23.979>
- 31 Kunert, A., Chmielewski, M., Wijers, R., Berrevoets, C., Abken, H. and Debets, R. (2017) Intra-tumoral production of IL18, but not IL12, by TCR-engineered T cells is non-toxic and counteracts immune evasion of solid tumors. *Oncoimmunology* **7**, e1378842, <https://doi.org/10.1080/2162402X.2017.1378842>
- 32 Patil, P.S., Mohandas, K.M., Bhatia, S.J. and Mehta, S.A. (2014) Serum ferritin and the risk of hepatocellular carcinoma in chronic liver disease of viral etiology: a case-control study. *Indian J. Gastroenterol.* **33**, 12–18, <https://doi.org/10.1007/s12664-013-0367-5>
- 33 Melia, W.M., Bullock, S., Johnson, P.J. and Williams, R. (1983) Serum ferritin in hepatocellular carcinoma. A comparison with alphafetoprotein. *Cancer* **51**, 2112–2115, [https://doi.org/10.1002/1097-0142\(19830601\)51:11%3c2112::AID-CNCR2820511126%3e3.0.CO;2-6](https://doi.org/10.1002/1097-0142(19830601)51:11%3c2112::AID-CNCR2820511126%3e3.0.CO;2-6)
- 34 Siriwardana, R.C., Niriella, M.A., Dassanayake, A., Ediriweera, D., Gunetilleke, B., Sivasundaram, T. et al. (2017) Association of serum ferritin with diabetes and alcohol in patients with non-viral liver disease-related hepatocellular carcinoma. *Liver Cancer* **6**, 307–312, <https://doi.org/10.1159/000477266>
- 35 Uchino, K., Tateishi, R., Nakagomi, R., Fujiwara, N., Minami, T., Sato, M. et al. (2018) Serum levels of ferritin do not affect the prognosis of patients with hepatocellular carcinoma undergoing radiofrequency ablation. *PLoS ONE* **13**, e0200943, <https://doi.org/10.1371/journal.pone.0200943>

- 36 Facciorusso, A., Del Prete, V., Antonino, M., Neve, V., Crucinio, N., Di Leo, A. et al. (2014) Serum ferritin as a new prognostic factor in hepatocellular carcinoma patients treated with radiofrequency ablation. *J. Gastroenterol. Hepatol.* **29**, 1905–1910, <https://doi.org/10.1111/jgh.12618>
